# Supplementary material
Source: PubMed Central journal article supplement (PMC4762068)
Supplement: NIHMS753670-supplement-Auxiliary_Production_File_1.pdf [file NIHMS753670-supplement-Auxiliary_Production_File_1.pdf]

# Thank You For Your Order!

Dear Dr. Karin Bornfeldt,

Thank you for placing your order through Copyright Clearance Center's RightsLink service. Elsevier has partnered with RightsLink to license its content. This notice is a confirmation that your order was successful.

Your order details and publisher terms and conditions are available by clicking the link below:

<http://s100.copyright.com/CustomerAdmin/PLF.jsp?ref=b7c2f763-0783-48c5-b99e-49ea2da782f3>

## Order Details

Licensee: University of Washington

License Date: Aug 28, 2015

License Number: 3697800485278

Publication: Atherosclerosis

Title: Natural progression of atherosclerosis from pathologic intimal thickening to late fibroatheroma in human coronary arteries: A pathology study

Type Of Use: reuse in a journal/magazine

Total: 90.85 USD

To access your account, please visit <https://myaccount.copyright.com>.

Please note: Online payments are charged immediately after order confirmation; invoices are issued daily and are payable immediately upon receipt.

To ensure that we are continuously improving our services, please take a moment to complete our [customer satisfaction survey](#).

B.1:v4.2

img top

mid

+1-855-239-3415 / Tel: +1-978-646-2777  
[customercare@copyright.com](mailto:customercare@copyright.com)  
<http://www.copyright.com>
