# Supplementary material
Source: PubMed Central journal article supplement (PMC4762068)
Supplement: NIHMS753670-supplement-Auxiliary_Production_File_2.pdf [file NIHMS753670-supplement-Auxiliary_Production_File_2.pdf]

# ELSEVIER LICENSE TERMS AND CONDITIONS

Oct 10, 2015

---

This is a License Agreement between University of Washington -- Karin Bornfeldt ("You") and Elsevier ("Elsevier") provided by Copyright Clearance Center ("CCC"). The license consists of your order details, the terms and conditions provided by Elsevier, and the payment terms and conditions.

|                                |                                                                                                                                                                                               |
|--------------------------------|-----------------------------------------------------------------------------------------------------------------------------------------------------------------------------------------------|
| Supplier                       | Elsevier Limited<br>The Boulevard,Langford Lane<br>Kidlington,Oxford,OX5 1GB,UK                                                                                                               |
| Registered Company Number      | 1982084                                                                                                                                                                                       |
| Customer name                  | University of Washington                                                                                                                                                                      |
| Customer address               | Department of Pathology, Box 357470<br>Seattle, WA 98195-7470                                                                                                                                 |
| License number                 | 3697800485278                                                                                                                                                                                 |
| License date                   | Aug 28, 2015                                                                                                                                                                                  |
| Licensed content publisher     | Elsevier                                                                                                                                                                                      |
| Licensed content publication   | Atherosclerosis                                                                                                                                                                               |
| Licensed content title         | Natural progression of atherosclerosis from pathologic intimal thickening to late fibroatheroma in human coronary arteries:<br>A pathology study                                              |
| Licensed content author        | Fumiyuki Otsuka,Miranda C.A. Kramer,Pier Woudstra,Kazuyuki Yahagi,Elena Ladich,Aloke V. Finn,Robbert J. de Winter,Frank D. Kolodgie,Thomas N. Wight,Harry R. Davis,Michael Joner,Renu Virmani |
| Licensed content date          | August 2015                                                                                                                                                                                   |
| Licensed content volume number | 241                                                                                                                                                                                           |
| Licensed content issue number  | 2                                                                                                                                                                                             |
