# Supplementary material
Source: PubMed Central journal article supplement (PMC4762068)
Supplement: NIHMS753670-supplement-Auxiliary_Production_File_3.pdf [file NIHMS753670-supplement-Auxiliary_Production_File_3.pdf]

|                                                 |                                                                          |
|-------------------------------------------------|--------------------------------------------------------------------------|
| Number of pages                                 | 11                                                                       |
| Start Page                                      | 772                                                                      |
| End Page                                        | 782                                                                      |
| Type of Use                                     | reuse in a journal/magazine                                              |
| Requestor type                                  | author of new work                                                       |
| Intended publisher of new work                  | Other                                                                    |
| Portion                                         | figures/tables/illustrations                                             |
| Number of figures/tables /illustrations         | 1                                                                        |
| Format                                          | both print and electronic                                                |
| Are you the author of this Elsevier article?    | No                                                                       |
| Will you be translating?                        | No                                                                       |
| Original figure numbers                         | part of Figure 1                                                         |
| Title of the article                            | Macrophage Phenotype and Function in Different Stages of Atherosclerosis |
| Publication new article is in                   | Circulation Research                                                     |
| Publisher of the new article                    | Lippincott Williams & Wilkins                                            |
| Author of new article                           | Ira Tabas & Karin E. Bornfeldt                                           |
| Expected publication date                       | Jan 2016                                                                 |
| Estimated size of new article (number of pages) | 15                                                                       |
| Elsevier VAT number                             | GB 494 6272 12                                                           |
| Billing Type                                    | Credit Card                                                              |
| Credit card info                                | Visa ending in 9441                                                      |
| Credit card expiration                          | 05/2016                                                                  |
| Permissions price                               | 90.85 USD                                                                |
